# Supplementary material for: Paternal over- and under-nutrition program fetal and placental development in a sex-specific manner in mice
Source: bioRxiv preprint, doi:10.1101/2025.11.14.688439, version 3 (2026-05-19)
Supplement: Supplemental Data 1 [file 688439_file04.xlsx]

## Sheet: MALE LPD vs CD
GeneID	Chromosome/scaffold name	Gene name	Gene type	Gene description	baseMean	log2FoldChange	padj

## Sheet: MALE MD-LPD vs CD
GeneID	Chromosome/scaffold name	Gene name	log2FoldChange	Gene type	Gene description	baseMean	log2FoldChange	padj
ENSMUSG00000000142	11	Axin2	1.16708	protein_coding	axin 2 [Source:MGI Symbol;Acc:MGI:1270862]	32.3185	1.16708	0.0460141
ENSMUSG00000000385	16	Tmprss2	0.544354	protein_coding	transmembrane protease, serine 2 [Source:MGI Symbol;Acc:MGI:1354381]	314.869	0.544354	0.0174937
ENSMUSG00000002603	7	Tgfb1	-0.346637	protein_coding	transforming growth factor, beta 1 [Source:MGI Symbol;Acc:MGI:98725]	1772.43	-0.346637	0.0149268
ENSMUSG00000002847	16	Pla1a	0.378436	protein_coding	phospholipase A1 member A [Source:MGI Symbol;Acc:MGI:1934677]	662.544	0.378436	0.0054628
ENSMUSG00000003477	6	Inmt	0.534698	protein_coding	indolethylamine N-methyltransferase [Source:MGI Symbol;Acc:MGI:102963]	1016.68	0.534698	0.0172077
ENSMUSG00000004105	2	Angptl2	0.891424	protein_coding	angiopoietin-like 2 [Source:MGI Symbol;Acc:MGI:1347002]	201.113	0.891424	1.42622e-05
ENSMUSG00000005686	7	Ampd3	0.478591	protein_coding	adenosine monophosphate deaminase 3 [Source:MGI Symbol;Acc:MGI:1096344]	1622.43	0.478591	0.00144645
ENSMUSG00000006958	16	Chrd	0.551295	protein_coding	chordin [Source:MGI Symbol;Acc:MGI:1313268]	1620.91	0.551295	0.0122155
ENSMUSG00000009687	7	Fxyd5	0.658179	protein_coding	FXYD domain-containing ion transport regulator 5 [Source:MGI Symbol;Acc:MGI:1201785]	222.32	0.658179	0.00267272
ENSMUSG00000016024	2	Lbp	0.552951	protein_coding	lipopolysaccharide binding protein [Source:MGI Symbol;Acc:MGI:1098776]	1330.11	0.552951	0.00367254
ENSMUSG00000016458	2	Wt1	0.50568	protein_coding	WT1 transcription factor [Source:MGI Symbol;Acc:MGI:98968]	1243.75	0.50568	0.0180506
ENSMUSG00000017400	11	Stac2	0.57359	protein_coding	SH3 and cysteine rich domain 2 [Source:MGI Symbol;Acc:MGI:2144518]	538.646	0.57359	0.00441355
ENSMUSG00000018339	11	Gpx3	0.582361	protein_coding	glutathione peroxidase 3 [Source:MGI Symbol;Acc:MGI:105102]	295.749	0.582361	0.000386057
ENSMUSG00000018822	19	Sfrp5	0.42883	protein_coding	secreted frizzled-related sequence protein 5 [Source:MGI Symbol;Acc:MGI:1860298]	29121	0.42883	1.0835e-05
ENSMUSG00000019768	10	Esr1	0.460528	protein_coding	estrogen receptor 1 (alpha) [Source:MGI Symbol;Acc:MGI:1352467]	2698.78	0.460528	0.00144645
ENSMUSG00000019929	10	Dcn	0.657173	protein_coding	decorin [Source:MGI Symbol;Acc:MGI:94872]	323.144	0.657173	0.000858168
ENSMUSG00000020077	10	Srgn	0.649718	protein_coding	serglycin [Source:MGI Symbol;Acc:MGI:97756]	16083.7	0.649718	7.84775e-11
ENSMUSG00000020312	10	Shc2	0.528563	protein_coding	SHC (Src homology 2 domain containing) transforming protein 2 [Source:MGI Symbol;Acc:MGI:106180]	13838	0.528563	0.000184767
ENSMUSG00000020473	11	Aebp1	0.515182	protein_coding	AE binding protein 1 [Source:MGI Symbol;Acc:MGI:1197012]	360.452	0.515182	0.00294918
ENSMUSG00000021127	12	Zfp36l1	0.668012	protein_coding	zinc finger protein 36, C3H type-like 1 [Source:MGI Symbol;Acc:MGI:107946]	1804.53	0.668012	6.03899e-07
ENSMUSG00000021508	13	Cxcl14	0.332641	protein_coding	C-X-C motif chemokine ligand 14 [Source:MGI Symbol;Acc:MGI:1888514]	1069.2	0.332641	0.0488685
ENSMUSG00000022324	15	Matn2	0.74581	protein_coding	matrilin 2 [Source:MGI Symbol;Acc:MGI:109613]	593.509	0.74581	0.00606857
ENSMUSG00000022390	15	Zc3h7b	0.605727	protein_coding	zinc finger CCCH type containing 7B [Source:MGI Symbol;Acc:MGI:1328310]	887.908	0.605727	1.35593e-08
ENSMUSG00000022887	16	Masp1	0.277497	protein_coding	MBL associated serine protease 1 [Source:MGI Symbol;Acc:MGI:88492]	1732.65	0.277497	0.0256459
ENSMUSG00000022952	16	Runx1	0.486448	protein_coding	runt related transcription factor 1 [Source:MGI Symbol;Acc:MGI:99852]	2717.45	0.486448	3.29308e-05
ENSMUSG00000023224	2	Serping1	0.465867	protein_coding	serine (or cysteine) peptidase inhibitor, clade G, member 1 [Source:MGI Symbol;Acc:MGI:894696]	665.627	0.465867	0.016658
ENSMUSG00000023992	17	Trem2	0.814876	protein_coding	triggering receptor expressed on myeloid cells 2 [Source:MGI Symbol;Acc:MGI:1913150]	2035.69	0.814876	5.51364e-08
ENSMUSG00000024053	17	Emilin2	0.510783	protein_coding	elastin microfibril interfacer 2 [Source:MGI Symbol;Acc:MGI:2389136]	736.107	0.510783	0.0191868
ENSMUSG00000024066	17	Xdh	0.512252	protein_coding	xanthine dehydrogenase [Source:MGI Symbol;Acc:MGI:98973]	2144.06	0.512252	0.00279951
ENSMUSG00000024084	17	Qpct	0.284178	protein_coding	glutaminyl-peptide cyclotransferase (glutaminyl cyclase) [Source:MGI Symbol;Acc:MGI:1917786]	1683.06	0.284178	0.00606857
ENSMUSG00000024521	18	Pmaip1	0.417497	protein_coding	phorbol-12-myristate-13-acetate-induced protein 1 [Source:MGI Symbol;Acc:MGI:1930146]	1151.37	0.417497	0.00801079
ENSMUSG00000025321	12	Itgb8	-0.525324	protein_coding	integrin beta 8 [Source:MGI Symbol;Acc:MGI:1338035]	376.779	-0.525324	0.041083
ENSMUSG00000025492	7	Ifitm3	0.60035	protein_coding	interferon induced transmembrane protein 3 [Source:MGI Symbol;Acc:MGI:1913391]	678.071	0.60035	0.0193138
ENSMUSG00000025938	1	Slco5a1	0.370154	protein_coding	solute carrier organic anion transporter family, member 5A1 [Source:MGI Symbol;Acc:MGI:2443431]	724.387	0.370154	0.0216852
ENSMUSG00000026208	1	Des	0.563621	protein_coding	desmin [Source:MGI Symbol;Acc:MGI:94885]	1114.75	0.563621	0.016658
ENSMUSG00000027514	2	Zbp1	0.486893	protein_coding	Z-DNA binding protein 1 [Source:MGI Symbol;Acc:MGI:1927449]	9345.02	0.486893	0.00973964
ENSMUSG00000028108	3	Ecm1	1.49293	protein_coding	extracellular matrix protein 1 [Source:MGI Symbol;Acc:MGI:103060]	103.073	1.49293	0.00412487
ENSMUSG00000028111	3	Ctsk	0.315604	protein_coding	cathepsin K [Source:MGI Symbol;Acc:MGI:107823]	1296.82	0.315604	0.0256904
ENSMUSG00000028369	4	Svep1	0.535832	protein_coding	sushi, von Willebrand factor type A, EGF and pentraxin domain containing 1 [Source:MGI Symbol;Acc:MGI:1928849]	9656.59	0.535832	0.0035625
ENSMUSG00000028967	4	Errfi1	0.416696	protein_coding	ERBB receptor feedback inhibitor 1 [Source:MGI Symbol;Acc:MGI:1921405]	795.558	0.416696	0.0149204
ENSMUSG00000029096	5	Htra3	0.495892	protein_coding	HtrA serine peptidase 3 [Source:MGI Symbol;Acc:MGI:1925808]	3753.8	0.495892	0.0121148
ENSMUSG00000029223	5	Uchl1	0.497139	protein_coding	ubiquitin carboxy-terminal hydrolase L1 [Source:MGI Symbol;Acc:MGI:103149]	9569.2	0.497139	2.60481e-07
ENSMUSG00000029816	6	Gpnmb	0.624158	protein_coding	glycoprotein (transmembrane) nmb [Source:MGI Symbol;Acc:MGI:1934765]	688.832	0.624158	0.00441355
ENSMUSG00000030111	6	A2m	0.698123	protein_coding	alpha-2-macroglobulin [Source:MGI Symbol;Acc:MGI:2449119]	1526.17	0.698123	6.67462e-05
ENSMUSG00000030123	6	Plxnd1	0.647205	protein_coding	plexin D1 [Source:MGI Symbol;Acc:MGI:2154244]	5151.48	0.647205	0.0065874
ENSMUSG00000030745	7	Il21r	0.404771	protein_coding	interleukin 21 receptor [Source:MGI Symbol;Acc:MGI:1890475]	1687.01	0.404771	0.016658
ENSMUSG00000030790	7	Adm	-0.693068	protein_coding	adrenomedullin [Source:MGI Symbol;Acc:MGI:108058]	179.099	-0.693068	0.0485028
ENSMUSG00000031616	8	Ednra	0.569151	protein_coding	endothelin receptor type A [Source:MGI Symbol;Acc:MGI:105923]	1837.14	0.569151	0.0286279
ENSMUSG00000031972	8	Acta1	0.479268	protein_coding	actin alpha 1, skeletal muscle [Source:MGI Symbol;Acc:MGI:87902]	200.179	0.479268	0.0346237
ENSMUSG00000032122	9	Slc37a2	-1.9191	protein_coding	solute carrier family 37 (glycerol-3-phosphate transporter), member 2 [Source:MGI Symbol;Acc:MGI:1929693]	24.7743	-1.9191	0.0450287
ENSMUSG00000032332	9	Col12a1	0.895689	protein_coding	collagen, type XII, alpha 1 [Source:MGI Symbol;Acc:MGI:88448]	69.748	0.895689	0.0122155
ENSMUSG00000033420	6	Antxr1	0.433788	protein_coding	anthrax toxin receptor 1 [Source:MGI Symbol;Acc:MGI:1916788]	2089.93	0.433788	0.018849
ENSMUSG00000033450	17	Tagap	0.47876	protein_coding	T cell activation Rho GTPase activating protein [Source:MGI Symbol;Acc:MGI:3615484]	1255.46	0.47876	0.00234637
ENSMUSG00000033470	14	Cysltr2	1.52865	protein_coding	cysteinyl leukotriene receptor 2 [Source:MGI Symbol;Acc:MGI:1917336]	136.245	1.52865	6.88793e-06
ENSMUSG00000034353	1	Ramp1	0.627411	protein_coding	receptor (calcitonin) activity modifying protein 1 [Source:MGI Symbol;Acc:MGI:1858418]	663.893	0.627411	0.000931347
ENSMUSG00000034595	17	Ppp1r18	0.394566	protein_coding	protein phosphatase 1, regulatory subunit 18 [Source:MGI Symbol;Acc:MGI:1923698]	1742.1	0.394566	0.00186813
ENSMUSG00000034839	9	Larp6	0.258376	protein_coding	La ribonucleoprotein 6, translational regulator [Source:MGI Symbol;Acc:MGI:1914807]	1351.25	0.258376	0.0304065
ENSMUSG00000035305	4	Ror1	0.927706	protein_coding	receptor tyrosine kinase-like orphan receptor 1 [Source:MGI Symbol;Acc:MGI:1347520]	79.096	0.927706	0.0149204
ENSMUSG00000035929	17	H2-Q4	0.370451	protein_coding	histocompatibility 2, Q region locus 4 [Source:MGI Symbol;Acc:MGI:95933]	446.781	0.370451	0.0292189
ENSMUSG00000036446	10	Lum	0.57541	protein_coding	lumican [Source:MGI Symbol;Acc:MGI:109347]	630.276	0.57541	0.000330778
ENSMUSG00000036545	11	Adamts2	0.75909	protein_coding	ADAM metallopeptidase with thrombospondin type 1 motif 2 [Source:MGI Symbol;Acc:MGI:1347356]	7431.13	0.75909	1.59387e-10
ENSMUSG00000036800	15	Fam135b	0.592969	protein_coding	family with sequence similarity 135, member B [Source:MGI Symbol;Acc:MGI:1917613]	2008.58	0.592969	1.35593e-08
ENSMUSG00000036905	4	C1qb	0.722262	protein_coding	complement component 1, q subcomponent, beta polypeptide [Source:MGI Symbol;Acc:MGI:88224]	412.041	0.722262	0.000309765
ENSMUSG00000037348	4	Paqr7	0.87628	protein_coding	progestin and adipoQ receptor family member VII [Source:MGI Symbol;Acc:MGI:1919154]	180.565	0.87628	0.0317052
ENSMUSG00000037606	7	Osbpl5	-0.479174	protein_coding	oxysterol binding protein-like 5 [Source:MGI Symbol;Acc:MGI:1930265]	369.386	-0.479174	0.025539
ENSMUSG00000037625	3	Cldn11	0.295418	protein_coding	claudin 11 [Source:MGI Symbol;Acc:MGI:106925]	1080.38	0.295418	0.016658
ENSMUSG00000037852	8	Cpe	0.880838	protein_coding	carboxypeptidase E [Source:MGI Symbol;Acc:MGI:101932]	904.341	0.880838	1.31012e-15
ENSMUSG00000039529	18	Atp8b1	0.490628	protein_coding	ATPase, class I, type 8B, member 1 [Source:MGI Symbol;Acc:MGI:1859665]	5587.42	0.490628	0.00066404
ENSMUSG00000039899	5	Fgl2	0.412929	protein_coding	fibrinogen-like protein 2 [Source:MGI Symbol;Acc:MGI:103266]	1456.3	0.412929	0.0149204
ENSMUSG00000041324	13	Inhba	0.840256	protein_coding	inhibin beta-A [Source:MGI Symbol;Acc:MGI:96570]	381.465	0.840256	0.0101207
ENSMUSG00000041642	1	Kif21b	0.430943	protein_coding	kinesin family member 21B [Source:MGI Symbol;Acc:MGI:109234]	9179.36	0.430943	0.0255304
ENSMUSG00000042485	14	Mustn1	0.746281	protein_coding	musculoskeletal, embryonic nuclear protein 1 [Source:MGI Symbol;Acc:MGI:1913425]	384.603	0.746281	0.0133593
ENSMUSG00000043501	15	Lgals2	0.493481	protein_coding	lectin, galactose-binding, soluble 2 [Source:MGI Symbol;Acc:MGI:895068]	891.644	0.493481	0.0422544
ENSMUSG00000044646	18	Zbtb7c	-2.38387	protein_coding	zinc finger and BTB domain containing 7C [Source:MGI Symbol;Acc:MGI:2443302]	49.0776	-2.38387	0.0013398
ENSMUSG00000045932	19	Ifit2	0.601755	protein_coding	interferon-induced protein with tetratricopeptide repeats 2 [Source:MGI Symbol;Acc:MGI:99449]	286.438	0.601755	0.015794
ENSMUSG00000046186	9	Cd109	0.727043	protein_coding	CD109 antigen [Source:MGI Symbol;Acc:MGI:2445221]	342.52	0.727043	0.00890805
ENSMUSG00000046314	12	Stxbp6	0.342339	protein_coding	syntaxin binding protein 6 (amisyn) [Source:MGI Symbol;Acc:MGI:2384963]	1780.79	0.342339	0.00912946
ENSMUSG00000046731	11	Kctd11	-0.548519	protein_coding	potassium channel tetramerisation domain containing 11 [Source:MGI Symbol;Acc:MGI:2448712]	182.14	-0.548519	0.0149204
ENSMUSG00000047878	15	A4galt	0.634382	protein_coding	alpha 1,4-galactosyltransferase [Source:MGI Symbol;Acc:MGI:3512453]	678.235	0.634382	0.000110822
ENSMUSG00000049866	1	Arl4c	0.331475	protein_coding	ADP-ribosylation factor-like 4C [Source:MGI Symbol;Acc:MGI:2445172]	1467.88	0.331475	0.0237245
ENSMUSG00000050721	9	Plekho2	0.256562	protein_coding	pleckstrin homology domain containing, family O member 2 [Source:MGI Symbol;Acc:MGI:2143132]	1419.37	0.256562	0.0191868
ENSMUSG00000055193	7	Klk15	0.499816	protein_coding	kallikrein related-peptidase 15 [Source:MGI Symbol;Acc:MGI:2447533]	1553.24	0.499816	1.54842e-06
ENSMUSG00000055254	13	Ntrk2	0.722911	protein_coding	neurotrophic tyrosine kinase, receptor, type 2 [Source:MGI Symbol;Acc:MGI:97384]	161.344	0.722911	0.00606857
ENSMUSG00000055413	17	H2-Q5	0.953967	protein_coding	histocompatibility 2, Q region locus 5 [Source:MGI Symbol;Acc:MGI:95934]	130.437	0.953967	0.0149204
ENSMUSG00000056116	17	H2-T22	0.413355	protein_coding	histocompatibility 2, T region locus 22 [Source:MGI Symbol;Acc:MGI:95956]	549.219	0.413355	0.00144645
ENSMUSG00000056427	11	Slit3	0.454262	protein_coding	slit guidance ligand 3 [Source:MGI Symbol;Acc:MGI:1315202]	506.63	0.454262	0.00880156
ENSMUSG00000056515	17	Rab31	0.263804	protein_coding	RAB31, member RAS oncogene family [Source:MGI Symbol;Acc:MGI:1914603]	2722.43	0.263804	0.0148305
ENSMUSG00000057969	9	Sema3b	0.388704	protein_coding	sema domain, immunoglobulin domain (Ig), short basic domain, secreted, (semaphorin) 3B [Source:MGI Symbol;Acc:MGI:107561]	1028.75	0.388704	0.00294918
ENSMUSG00000058624	19	Gda	0.601754	protein_coding	guanine deaminase [Source:MGI Symbol;Acc:MGI:95678]	438.21	0.601754	8.93435e-06
ENSMUSG00000060550	17	H2-Q7	0.642219	protein_coding	histocompatibility 2, Q region locus 7 [Source:MGI Symbol;Acc:MGI:95936]	670.347	0.642219	6.67462e-05
ENSMUSG00000060802	2	B2m	0.490616	protein_coding	beta-2 microglobulin [Source:MGI Symbol;Acc:MGI:88127]	8688.98	0.490616	1.59387e-10
ENSMUSG00000061232	17	H2-K1	0.317412	protein_coding	histocompatibility 2, K1, K region [Source:MGI Symbol;Acc:MGI:95904]	15800.1	0.317412	0.0488685
ENSMUSG00000062515	3	Fabp4	0.395401	protein_coding	fatty acid binding protein 4, adipocyte [Source:MGI Symbol;Acc:MGI:88038]	2668.83	0.395401	0.0243025
ENSMUSG00000062609	16	Kcnj15	-0.757227	protein_coding	potassium inwardly-rectifying channel, subfamily J, member 15 [Source:MGI Symbol;Acc:MGI:1310000]	643.77	-0.757227	0.00412487
ENSMUSG00000062980	6	Cped1	0.550971	protein_coding	cadherin-like and PC-esterase domain containing 1 [Source:MGI Symbol;Acc:MGI:2444814]	338.741	0.550971	0.00441355
ENSMUSG00000063415	6	Cyp26b1	0.524849	protein_coding	cytochrome P450, family 26, subfamily b, polypeptide 1 [Source:MGI Symbol;Acc:MGI:2176159]	783.878	0.524849	0.00125372
ENSMUSG00000063727	15	Tnfrsf11b	0.57722	protein_coding	tumor necrosis factor receptor superfamily, member 11b (osteoprotegerin) [Source:MGI Symbol;Acc:MGI:109587]	4502.55	0.57722	4.46745e-06
ENSMUSG00000067212	17	H2-T23	0.345098	protein_coding	histocompatibility 2, T region locus 23 [Source:MGI Symbol;Acc:MGI:95957]	1654.74	0.345098	0.0112548
ENSMUSG00000071713	15	Csf2rb	0.557245	protein_coding	colony stimulating factor 2 receptor, beta, low-affinity (granulocyte-macrophage) [Source:MGI Symbol;Acc:MGI:1339759]	443.086	0.557245	0.0146247
ENSMUSG00000072720	5	Myo18b	0.517118	protein_coding	myosin XVIIIb [Source:MGI Symbol;Acc:MGI:1921626]	444.542	0.517118	0.015794
ENSMUSG00000073409	17	H2-Q6	0.759196	protein_coding	histocompatibility 2, Q region locus 6 [Source:MGI Symbol;Acc:MGI:95935]	300.846	0.759196	0.00251153
ENSMUSG00000073411	17	H2-D1	0.368669	protein_coding	histocompatibility 2, D region locus 1 [Source:MGI Symbol;Acc:MGI:95896]	16309.3	0.368669	0.0035625

## Sheet: MALE WD vs CD
GeneID	Chromosome/scaffold name	Gene name	Gene type	Gene description	baseMean	log2FoldChange	padj
ENSMUSG00000000154	7	Slc22a18	protein_coding	solute carrier family 22 (organic cation transporter), member 18 [Source:MGI Symbol;Acc:MGI:1336884]	352.778	0.594894	0.00153821
ENSMUSG00000000385	16	Tmprss2	protein_coding	transmembrane protease, serine 2 [Source:MGI Symbol;Acc:MGI:1354381]	1419.05	0.342602	0.00372728
ENSMUSG00000002847	16	Pla1a	protein_coding	phospholipase A1 member A [Source:MGI Symbol;Acc:MGI:1934677]	1867.64	0.66624	1.80806e-05
ENSMUSG00000007655	6	Cav1	protein_coding	caveolin 1, caveolae protein [Source:MGI Symbol;Acc:MGI:102709]	8081.66	0.365634	1.98116e-05
ENSMUSG00000009687	7	Fxyd5	protein_coding	FXYD domain-containing ion transport regulator 5 [Source:MGI Symbol;Acc:MGI:1201785]	91.9058	0.947	0.00866042
ENSMUSG00000013584	9	Aldh1a2	protein_coding	aldehyde dehydrogenase family 1, subfamily A2 [Source:MGI Symbol;Acc:MGI:107928]	772.061	-0.522065	0.0113829
ENSMUSG00000018217	11	Pmp22	protein_coding	peripheral myelin protein 22 [Source:MGI Symbol;Acc:MGI:97631]	906.938	-0.498354	6.03489e-05
ENSMUSG00000019929	10	Dcn	protein_coding	decorin [Source:MGI Symbol;Acc:MGI:94872]	2599.05	-0.424313	0.00157864
ENSMUSG00000020077	10	Srgn	protein_coding	serglycin [Source:MGI Symbol;Acc:MGI:97756]	402.386	0.446279	0.0249702
ENSMUSG00000020473	11	Aebp1	protein_coding	AE binding protein 1 [Source:MGI Symbol;Acc:MGI:1197012]	1484.76	-0.519728	0.00152629
ENSMUSG00000021253	12	Tgfb3	protein_coding	transforming growth factor, beta 3 [Source:MGI Symbol;Acc:MGI:98727]	510.323	-0.830896	3.44492e-05
ENSMUSG00000022324	15	Matn2	protein_coding	matrilin 2 [Source:MGI Symbol;Acc:MGI:109613]	1452.95	0.643747	0.041255
ENSMUSG00000023224	2	Serping1	protein_coding	serine (or cysteine) peptidase inhibitor, clade G, member 1 [Source:MGI Symbol;Acc:MGI:894696]	1206.16	0.447069	0.0113829
ENSMUSG00000025270	X	Alas2	protein_coding	aminolevulinic acid synthase 2, erythroid [Source:MGI Symbol;Acc:MGI:87990]	998.887	-0.494351	6.03489e-05
ENSMUSG00000025889	6	Snca	protein_coding	synuclein, alpha [Source:MGI Symbol;Acc:MGI:1277151]	389.467	-0.571624	0.0169751
ENSMUSG00000029816	6	Gpnmb	protein_coding	glycoprotein (transmembrane) nmb [Source:MGI Symbol;Acc:MGI:1934765]	1233.16	0.421067	0.00381978
ENSMUSG00000031765	8	Mt1	protein_coding	metallothionein 1 [Source:MGI Symbol;Acc:MGI:97171]	57057.1	-0.755826	2.59693e-06
ENSMUSG00000033420	6	Antxr1	protein_coding	anthrax toxin receptor 1 [Source:MGI Symbol;Acc:MGI:1916788]	163.516	0.830989	0.0147276
ENSMUSG00000034009	3	Rxfp1	protein_coding	relaxin/insulin-like family peptide receptor 1 [Source:MGI Symbol;Acc:MGI:2682211]	18353.2	-0.931035	2.19445e-06
ENSMUSG00000034308	8	Sdr42e1	protein_coding	short chain dehydrogenase/reductase family 42E, member 1 [Source:MGI Symbol;Acc:MGI:1921282]	4822.82	0.504926	0.0190408
ENSMUSG00000034926	4	Dhcr24	protein_coding	24-dehydrocholesterol reductase [Source:MGI Symbol;Acc:MGI:1922004]	1043.25	0.332283	0.0249702
ENSMUSG00000036446	10	Lum	protein_coding	lumican [Source:MGI Symbol;Acc:MGI:109347]	70.2817	1.29216	5.77985e-05
ENSMUSG00000038298	3	Pdzk1	protein_coding	PDZ domain containing 1 [Source:MGI Symbol;Acc:MGI:1928901]	15081	0.553776	0.000655769
ENSMUSG00000038871	6	Bpgm	protein_coding	2,3-bisphosphoglycerate mutase [Source:MGI Symbol;Acc:MGI:1098242]	12813.8	0.392467	0.0247207
ENSMUSG00000041642	1	Kif21b	protein_coding	kinesin family member 21B [Source:MGI Symbol;Acc:MGI:109234]	6772.3	0.590056	6.73971e-08
ENSMUSG00000046607	5	Hrk	protein_coding	harakiri, BCL2 interacting protein (contains only BH3 domain) [Source:MGI Symbol;Acc:MGI:1201608]	2090.02	-0.338213	0.0153489
ENSMUSG00000049866	1	Arl4c	protein_coding	ADP-ribosylation factor-like 4C [Source:MGI Symbol;Acc:MGI:2445172]	1678.5	0.549986	0.00197203
ENSMUSG00000052305	7	Hbb-bs	protein_coding	hemoglobin, beta adult s chain [Source:MGI Symbol;Acc:MGI:5474852]	19754.5	-0.546398	0.0468534
ENSMUSG00000053398	3	Phgdh	protein_coding	3-phosphoglycerate dehydrogenase [Source:MGI Symbol;Acc:MGI:1355330]	1574.5	0.278239	0.0249702
ENSMUSG00000055193	7	Klk15	protein_coding	kallikrein related-peptidase 15 [Source:MGI Symbol;Acc:MGI:2447533]	831.669	0.504522	0.0287423
ENSMUSG00000060802	2	B2m	protein_coding	beta-2 microglobulin [Source:MGI Symbol;Acc:MGI:88127]	4187.67	0.455636	0.00389877
ENSMUSG00000063727	15	Tnfrsf11b	protein_coding	tumor necrosis factor receptor superfamily, member 11b (osteoprotegerin) [Source:MGI Symbol;Acc:MGI:109587]	1717.17	-0.356476	0.0115751
ENSMUSG00000069919	11	Hba-a1	protein_coding	hemoglobin alpha, adult chain 1 [Source:MGI Symbol;Acc:MGI:96015]	970.56	0.485434	0.0107723
ENSMUSG00000073940	7	Hbb-bt	protein_coding	hemoglobin, beta adult t chain [Source:MGI Symbol;Acc:MGI:5474850]	2242.35	-0.623875	0.000570777

## Sheet: MALE MD-WD vs CD
GeneID	Chromosome/scaffold name	Gene name	Gene type	Gene description	baseMean	log2FoldChange	padj
ENSMUSG00000000385	16	Tmprss2	protein_coding	transmembrane protease, serine 2 [Source:MGI Symbol;Acc:MGI:1354381]	20708.5	-0.475925	0.0488368
ENSMUSG00000001418	3	Glmp	protein_coding	glycosylated lysosomal membrane protein [Source:MGI Symbol;Acc:MGI:1913318]	100.918	-1.17091	0.0015791
ENSMUSG00000002847	16	Pla1a	protein_coding	phospholipase A1 member A [Source:MGI Symbol;Acc:MGI:1934677]	1716.56	-0.396673	0.00084526
ENSMUSG00000006574	11	Slc4a1	protein_coding	solute carrier family 4 (anion exchanger), member 1 [Source:MGI Symbol;Acc:MGI:109393]	5775.23	0.301154	0.0439952
ENSMUSG00000006948	7	Klk4	protein_coding	kallikrein related-peptidase 4 (prostase, enamel matrix, prostate) [Source:MGI Symbol;Acc:MGI:1861379]	968.569	0.450942	0.0143245
ENSMUSG00000007655	6	Cav1	protein_coding	caveolin 1, caveolae protein [Source:MGI Symbol;Acc:MGI:102709]	189.445	-0.971469	0.024969
ENSMUSG00000009687	7	Fxyd5	protein_coding	FXYD domain-containing ion transport regulator 5 [Source:MGI Symbol;Acc:MGI:1201785]	208.201	0.99313	0.00879762
ENSMUSG00000015340	X	Cybb	protein_coding	cytochrome b-245, beta polypeptide [Source:MGI Symbol;Acc:MGI:88574]	1491.47	-0.542839	0.00497318
ENSMUSG00000019929	10	Dcn	protein_coding	decorin [Source:MGI Symbol;Acc:MGI:94872]	1329.49	0.604305	5.07001e-07
ENSMUSG00000020473	11	Aebp1	protein_coding	AE binding protein 1 [Source:MGI Symbol;Acc:MGI:1197012]	77.9566	0.840327	0.028872
ENSMUSG00000021943	14	Gdf10	protein_coding	growth differentiation factor 10 [Source:MGI Symbol;Acc:MGI:95684]	15676.9	0.631789	7.26507e-06
ENSMUSG00000022025	14	Cnmd	protein_coding	chondromodulin [Source:MGI Symbol;Acc:MGI:1341171]	1690.65	0.542246	0.00689951
ENSMUSG00000022174	14	Dad1	protein_coding	defender against cell death 1 [Source:MGI Symbol;Acc:MGI:101912]	60.3715	1.80566	0.000925632
ENSMUSG00000022949	16	Clic6	protein_coding	chloride intracellular channel 6 [Source:MGI Symbol;Acc:MGI:2146607]	102.641	1.00854	0.0491944
ENSMUSG00000023045	15	Soat2	protein_coding	sterol O-acyltransferase 2 [Source:MGI Symbol;Acc:MGI:1332226]	2219.72	0.389668	0.043227
ENSMUSG00000023224	2	Serping1	protein_coding	serine (or cysteine) peptidase inhibitor, clade G, member 1 [Source:MGI Symbol;Acc:MGI:894696]	36.4408	-2.49978	0.0143347
ENSMUSG00000023992	17	Trem2	protein_coding	triggering receptor expressed on myeloid cells 2 [Source:MGI Symbol;Acc:MGI:1913150]	37.7351	-1.9902	0.0488368
ENSMUSG00000024066	17	Xdh	protein_coding	xanthine dehydrogenase [Source:MGI Symbol;Acc:MGI:98973]	1978.69	0.791758	3.308e-13
ENSMUSG00000024084	17	Qpct	protein_coding	glutaminyl-peptide cyclotransferase (glutaminyl cyclase) [Source:MGI Symbol;Acc:MGI:1917786]	821.585	0.850254	0.000366448
ENSMUSG00000025270	X	Alas2	protein_coding	aminolevulinic acid synthase 2, erythroid [Source:MGI Symbol;Acc:MGI:87990]	1683.43	0.340984	0.0203565
ENSMUSG00000025889	6	Snca	protein_coding	synuclein, alpha [Source:MGI Symbol;Acc:MGI:1277151]	1207.13	0.602734	0.00450276
ENSMUSG00000026073	1	Il1r2	protein_coding	interleukin 1 receptor, type II [Source:MGI Symbol;Acc:MGI:96546]	2195.58	-0.765335	0.000176097
ENSMUSG00000026434	1	Nucks1	protein_coding	nuclear casein kinase and cyclin-dependent kinase substrate 1 [Source:MGI Symbol;Acc:MGI:1934811]	526.915	-0.726673	0.00923641
ENSMUSG00000026621	1	Mtarc1	protein_coding	mitochondrial amidoxime reducing component 1 [Source:MGI Symbol;Acc:MGI:1913362]	2049.24	0.591243	0.0145397
ENSMUSG00000027377	2	Mall	protein_coding	mal, T cell differentiation protein-like [Source:MGI Symbol;Acc:MGI:2385152]	1002.31	-0.412747	0.0122059
ENSMUSG00000027602	2	Map1lc3a	protein_coding	microtubule-associated protein 1 light chain 3 alpha [Source:MGI Symbol;Acc:MGI:1915661]	51.0144	-1.19996	0.0370515
ENSMUSG00000027875	3	Hmgcs2	protein_coding	3-hydroxy-3-methylglutaryl-Coenzyme A synthase 2 [Source:MGI Symbol;Acc:MGI:101939]	364.475	0.755103	0.000465903
ENSMUSG00000028238	4	Atp6v0d2	protein_coding	ATPase, H+ transporting, lysosomal V0 subunit D2 [Source:MGI Symbol;Acc:MGI:1924415]	1371.01	0.409421	0.0358757
ENSMUSG00000028356	4	Ambp	protein_coding	alpha 1 microglobulin/bikunin precursor [Source:MGI Symbol;Acc:MGI:88002]	223.926	-0.522859	0.0491944
ENSMUSG00000028528	4	Dnajc6	protein_coding	DnaJ heat shock protein family (Hsp40) member C6 [Source:MGI Symbol;Acc:MGI:1919935]	445.173	0.576246	0.0434024
ENSMUSG00000029070	4	Mxra8	protein_coding	matrix-remodelling associated 8 [Source:MGI Symbol;Acc:MGI:1922011]	16.1918	-3.4713	0.0259201
ENSMUSG00000029096	5	Htra3	protein_coding	HtrA serine peptidase 3 [Source:MGI Symbol;Acc:MGI:1925808]	11.9845	-2.99232	0.0271661
ENSMUSG00000029816	6	Gpnmb	protein_coding	glycoprotein (transmembrane) nmb [Source:MGI Symbol;Acc:MGI:1934765]	2097.83	0.45148	0.0329257
ENSMUSG00000030472	7	Ceacam18	protein_coding	CEA cell adhesion molecule 18 [Source:MGI Symbol;Acc:MGI:1919681]	9257.98	0.457412	0.00812132
ENSMUSG00000031445	8	Proz	protein_coding	protein Z, vitamin K-dependent plasma glycoprotein [Source:MGI Symbol;Acc:MGI:1860488]	1598.24	0.863627	0.000176097
ENSMUSG00000031762	8	Mt2	protein_coding	metallothionein 2 [Source:MGI Symbol;Acc:MGI:97172]	75.6732	1.62528	0.000100266
ENSMUSG00000032060	9	Cryab	protein_coding	crystallin, alpha B [Source:MGI Symbol;Acc:MGI:88516]	17.3893	-3.1949	0.0328196
ENSMUSG00000033713	12	Foxn3	protein_coding	forkhead box N3 [Source:MGI Symbol;Acc:MGI:1918625]	5266.68	0.488204	0.0434024
ENSMUSG00000033880	11	Lgals3bp	protein_coding	lectin, galactoside-binding, soluble, 3 binding protein [Source:MGI Symbol;Acc:MGI:99554]	7742.94	0.579926	2.45769e-07
ENSMUSG00000034353	1	Ramp1	protein_coding	receptor (calcitonin) activity modifying protein 1 [Source:MGI Symbol;Acc:MGI:1858418]	1644.79	-0.463859	0.0488368
ENSMUSG00000034926	4	Dhcr24	protein_coding	24-dehydrocholesterol reductase [Source:MGI Symbol;Acc:MGI:1922004]	5541.4	0.334977	0.0292455
ENSMUSG00000035202	9	Lars2	protein_coding	leucyl-tRNA synthetase, mitochondrial [Source:MGI Symbol;Acc:MGI:2142973]	1774.46	0.50049	0.0292455
ENSMUSG00000035407	4	Kank4	protein_coding	KN motif and ankyrin repeat domains 4 [Source:MGI Symbol;Acc:MGI:3043381]	2678.34	-0.344742	0.0434024
ENSMUSG00000036896	4	C1qc	protein_coding	complement component 1, q subcomponent, C chain [Source:MGI Symbol;Acc:MGI:88225]	1400.96	-0.525951	0.0130006
ENSMUSG00000036905	4	C1qb	protein_coding	complement component 1, q subcomponent, beta polypeptide [Source:MGI Symbol;Acc:MGI:88224]	229.001	-0.565377	0.0203565
ENSMUSG00000037852	8	Cpe	protein_coding	carboxypeptidase E [Source:MGI Symbol;Acc:MGI:101932]	152.559	1.00373	0.00447283
ENSMUSG00000038642	3	Ctss	protein_coding	cathepsin S [Source:MGI Symbol;Acc:MGI:107341]	184.012	0.96765	0.0273992
ENSMUSG00000038871	6	Bpgm	protein_coding	2,3-bisphosphoglycerate mutase [Source:MGI Symbol;Acc:MGI:1098242]	5521.23	0.510144	0.0143347
ENSMUSG00000039899	5	Fgl2	protein_coding	fibrinogen-like protein 2 [Source:MGI Symbol;Acc:MGI:103266]	325.561	0.994976	0.00141941
ENSMUSG00000039903	16	Eva1c	protein_coding	eva-1 homolog C [Source:MGI Symbol;Acc:MGI:1918217]	1010.33	-0.489541	0.0358757
ENSMUSG00000040552	6	C3ar1	protein_coding	complement component 3a receptor 1 [Source:MGI Symbol;Acc:MGI:1097680]	370.179	0.809328	0.0494361
ENSMUSG00000040966	17	Slc22a2	protein_coding	solute carrier family 22 (organic cation transporter), member 2 [Source:MGI Symbol;Acc:MGI:1335072]	632.057	0.574332	0.043227
ENSMUSG00000041120	4	Nbl1	protein_coding	NBL1, DAN family BMP antagonist [Source:MGI Symbol;Acc:MGI:104591]	96.4733	0.754263	0.0488368
ENSMUSG00000041736	15	Tspo	protein_coding	translocator protein [Source:MGI Symbol;Acc:MGI:88222]	20.2014	-3.11257	0.0329257
ENSMUSG00000044285	14	Ubb-ps	transcribed_processed_pseudogene	ubiquitin B, pseudogene [Source:MGI Symbol;Acc:MGI:3037679]	3206.31	0.37573	0.0143347
ENSMUSG00000046314	12	Stxbp6	protein_coding	syntaxin binding protein 6 (amisyn) [Source:MGI Symbol;Acc:MGI:2384963]	771.791	0.357073	0.043227
ENSMUSG00000046805	19	Mpeg1	protein_coding	macrophage expressed gene 1 [Source:MGI Symbol;Acc:MGI:1333743]	178.584	-0.554117	0.043227
ENSMUSG00000049422	10	Chchd10	protein_coding	coiled-coil-helix-coiled-coil-helix domain containing 10 [Source:MGI Symbol;Acc:MGI:2143558]	248.141	0.906162	0.00273602
ENSMUSG00000049866	1	Arl4c	protein_coding	ADP-ribosylation factor-like 4C [Source:MGI Symbol;Acc:MGI:2445172]	1031.88	0.503047	0.0309696
ENSMUSG00000050335	14	Lgals3	protein_coding	lectin, galactose binding, soluble 3 [Source:MGI Symbol;Acc:MGI:96778]	1436.58	0.350459	0.0328196
ENSMUSG00000052305	7	Hbb-bs	protein_coding	hemoglobin, beta adult s chain [Source:MGI Symbol;Acc:MGI:5474852]	12406.5	0.383319	0.0221995
ENSMUSG00000055193	7	Klk15	protein_coding	kallikrein related-peptidase 15 [Source:MGI Symbol;Acc:MGI:2447533]	59059.4	-0.644372	0.00497318
ENSMUSG00000060802	2	B2m	protein_coding	beta-2 microglobulin [Source:MGI Symbol;Acc:MGI:88127]	186.754	1.12589	8.54496e-08
ENSMUSG00000063415	6	Cyp26b1	protein_coding	cytochrome P450, family 26, subfamily b, polypeptide 1 [Source:MGI Symbol;Acc:MGI:2176159]	8248.96	0.396273	7.26507e-06
ENSMUSG00000064368	MT	mt-Nd6	protein_coding	mitochondrially encoded NADH dehydrogenase 6 [Source:MGI Symbol;Acc:MGI:102495]	754.415	0.471097	0.0172695
ENSMUSG00000069094	3	Pde7a	protein_coding	phosphodiesterase 7A [Source:MGI Symbol;Acc:MGI:1202402]	520.652	-0.816168	0.00253015
ENSMUSG00000069516	10	Lyz2	protein_coding	lysozyme 2 [Source:MGI Symbol;Acc:MGI:96897]	448.196	-0.493515	0.0143347
ENSMUSG00000079092	13	Prl2c2	protein_coding	prolactin family 2, subfamily c, member 2 [Source:MGI Symbol;Acc:MGI:97618]	601.361	0.668863	0.000951948
ENSMUSG00000079259	9	Trim71	protein_coding	tripartite motif-containing 71 [Source:MGI Symbol;Acc:MGI:2685973]	3438.85	0.506859	0.0329257
ENSMUSG00000079845	X	Xlr4a	protein_coding	X-linked lymphocyte-regulated 4A [Source:MGI Symbol;Acc:MGI:3574098]	484.951	-0.496189	0.043227
ENSMUSG00000090486	1	BC035947	protein_coding	cDNA sequence BC035947 [Source:MGI Symbol;Acc:MGI:2652858]	404.385	-0.68544	0.0329257
ENSMUSG00000090698	6	Apold1	protein_coding	apolipoprotein L domain containing 1 [Source:MGI Symbol;Acc:MGI:2685921]	30.6875	-2.06073	0.028872
ENSMUSG00000092035	6	Peg10	protein_coding	paternally expressed 10 [Source:MGI Symbol;Acc:MGI:2157785]	88.6488	-0.818951	0.043227
ENSMUSG00000092341	19	Malat1	lncRNA	metastasis associated lung adenocarcinoma transcript 1 (non-coding RNA) [Source:MGI Symbol;Acc:MGI:1919539]	65221.3	-0.361351	0.0370515
ENSMUSG00000096001	14	Gpr15lg	protein_coding	G protein coupled receptor 15 ligand [Source:MGI Symbol;Acc:MGI:1917295]	272.797	0.676203	0.00524801
ENSMUSG00000109105	7	Gm44873	TEC	predicted gene 44873 [Source:MGI Symbol;Acc:MGI:5753449]	11.4936	-3.45909	0.0494361
ENSMUSG00000114185	13	Gm47662	lncRNA	predicted gene, 47662 [Source:MGI Symbol;Acc:MGI:6096750]	1182.4	0.365762	0.043227

## Sheet: FEMALE LPD vs CD
GeneID	Chromosome/scaffold name	Gene name	Gene type	Gene description	baseMean	log2FoldChange	padj

## Sheet: FEMALE MD-LPD vs CD
GeneID	Chromosome/scaffold name	Gene name	Gene type	Gene description	baseMean	log2FoldChange	padj
ENSMUSG00000004552	1	Ctse	protein_coding	cathepsin E [Source:MGI Symbol;Acc:MGI:107361]	68.1455	-1.13957	0.0154338
ENSMUSG00000040152	2	Thbs1	protein_coding	thrombospondin 1 [Source:MGI Symbol;Acc:MGI:98737]	929.549	-0.557637	0.0162838
ENSMUSG00000042357	4	Gjb5	protein_coding	gap junction protein, beta 5 [Source:MGI Symbol;Acc:MGI:95723]	822.962	0.476882	0.0471172

## Sheet: FEMALE WD vs CD
GeneID	Chromosome/scaffold name	Gene name	Gene type	Gene description	baseMean	log2FoldChange	padj
ENSMUSG00000001281	15	Itgb7	protein_coding	integrin beta 7 [Source:MGI Symbol;Acc:MGI:96616]	2485.96	-0.511765	0.000129986
ENSMUSG00000001864	2	Aif1l	protein_coding	allograft inflammatory factor 1-like [Source:MGI Symbol;Acc:MGI:1919598]	3564.5	-0.583098	0.0357464
ENSMUSG00000002808	13	Epdr1	protein_coding	ependymin related 1 [Source:MGI Symbol;Acc:MGI:2145369]	673.855	-0.584539	0.0202671
ENSMUSG00000004655	6	Aqp1	protein_coding	aquaporin 1 [Source:MGI Symbol;Acc:MGI:103201]	1655.98	-0.435643	0.0265188
ENSMUSG00000005686	7	Ampd3	protein_coding	adenosine monophosphate deaminase 3 [Source:MGI Symbol;Acc:MGI:1096344]	576.513	-0.87465	0.0308504
ENSMUSG00000006221	4	Hspb7	protein_coding	heat shock protein family, member 7 (cardiovascular) [Source:MGI Symbol;Acc:MGI:1352494]	4968.95	-0.580771	0.0019659
ENSMUSG00000007682	12	Dio2	protein_coding	deiodinase, iodothyronine, type II [Source:MGI Symbol;Acc:MGI:1338833]	3565.4	-0.460924	0.0407236
ENSMUSG00000018822	19	Sfrp5	protein_coding	secreted frizzled-related sequence protein 5 [Source:MGI Symbol;Acc:MGI:1860298]	485.329	-0.636891	0.0299288
ENSMUSG00000019124	6	Scrn1	protein_coding	secernin 1 [Source:MGI Symbol;Acc:MGI:1917188]	3335.13	0.321981	0.00348209
ENSMUSG00000019734	7	Tmc4	protein_coding	transmembrane channel-like gene family 4 [Source:MGI Symbol;Acc:MGI:2669035]	9593.46	-0.648941	0.000129986
ENSMUSG00000019756	13	Prl8a1	protein_coding	prolactin family 8, subfamily a, member 1 [Source:MGI Symbol;Acc:MGI:1920494]	8073.02	-0.75528	0.00766195
ENSMUSG00000020325	10	Fstl3	protein_coding	follistatin-like 3 [Source:MGI Symbol;Acc:MGI:1890391]	38.9118	-1.78237	0.00348209
ENSMUSG00000020826	11	Nos2	protein_coding	nitric oxide synthase 2, inducible [Source:MGI Symbol;Acc:MGI:97361]	124.994	-0.777079	0.0370545
ENSMUSG00000021994	14	Wnt5a	protein_coding	wingless-type MMTV integration site family, member 5A [Source:MGI Symbol;Acc:MGI:98958]	633.214	0.652682	0.0323361
ENSMUSG00000022048	14	Dpysl2	protein_coding	dihydropyrimidinase-like 2 [Source:MGI Symbol;Acc:MGI:1349763]	483.484	0.751524	0.00428788
ENSMUSG00000022261	15	Sdc2	protein_coding	syndecan 2 [Source:MGI Symbol;Acc:MGI:1349165]	428.94	0.66254	0.0126602
ENSMUSG00000022512	16	Cldn1	protein_coding	claudin 1 [Source:MGI Symbol;Acc:MGI:1276109]	1707.44	0.296644	0.0220819
ENSMUSG00000022894	16	Adamts5	protein_coding	ADAM metallopeptidase with thrombospondin type 1 motif 5 [Source:MGI Symbol;Acc:MGI:1346321]	451.852	-0.658528	0.00713195
ENSMUSG00000023009	15	Nckap5l	protein_coding	NCK-associated protein 5-like [Source:MGI Symbol;Acc:MGI:3609653]	149.663	-0.935845	0.0434656
ENSMUSG00000023886	17	Smoc2	protein_coding	SPARC related modular calcium binding 2 [Source:MGI Symbol;Acc:MGI:1929881]	537.003	-0.447079	0.0226039
ENSMUSG00000024697	19	Gna14	protein_coding	guanine nucleotide binding protein, alpha 14 [Source:MGI Symbol;Acc:MGI:95769]	665.5	-0.654469	0.00348209
ENSMUSG00000024924	19	Vldlr	protein_coding	very low density lipoprotein receptor [Source:MGI Symbol;Acc:MGI:98935]	58.9905	-0.972118	0.0394358
ENSMUSG00000025026	19	Add3	protein_coding	adducin 3 [Source:MGI Symbol;Acc:MGI:1351615]	1448.77	0.33414	0.0469058
ENSMUSG00000026042	1	Col5a2	protein_coding	collagen, type V, alpha 2 [Source:MGI Symbol;Acc:MGI:88458]	528.087	0.788183	0.00793512
ENSMUSG00000026303	1	Mlph	protein_coding	melanophilin [Source:MGI Symbol;Acc:MGI:2176380]	822.723	0.498494	0.00964275
ENSMUSG00000026399	1	Cd55	protein_coding	CD55 molecule, decay accelerating factor for complement [Source:MGI Symbol;Acc:MGI:104850]	665.476	-0.731948	0.0126602
ENSMUSG00000026479	1	Lamc2	protein_coding	laminin, gamma 2 [Source:MGI Symbol;Acc:MGI:99913]	975.057	-0.769748	0.0383851
ENSMUSG00000026674	1	Ddr2	protein_coding	discoidin domain receptor family, member 2 [Source:MGI Symbol;Acc:MGI:1345277]	302.112	0.608743	0.00649933
ENSMUSG00000026822	2	Lcn2	protein_coding	lipocalin 2 [Source:MGI Symbol;Acc:MGI:96757]	221.721	-0.992977	0.0407236
ENSMUSG00000026979	2	Psd4	protein_coding	pleckstrin and Sec7 domain containing 4 [Source:MGI Symbol;Acc:MGI:2674093]	791.469	0.288065	0.0469058
ENSMUSG00000027199	2	Gatm	protein_coding	glycine amidinotransferase (L-arginine:glycine amidinotransferase) [Source:MGI Symbol;Acc:MGI:1914342]	922.153	0.545348	0.0260538
ENSMUSG00000027378	2	Nphp1	protein_coding	nephronophthisis 1 (juvenile) homolog (human) [Source:MGI Symbol;Acc:MGI:1858233]	448.846	-0.680411	0.0493222
ENSMUSG00000027487	2	Cdk5rap1	protein_coding	CDK5 regulatory subunit associated protein 1 [Source:MGI Symbol;Acc:MGI:1914221]	5105.96	0.46929	0.0378214
ENSMUSG00000028015	3	Ctso	protein_coding	cathepsin O [Source:MGI Symbol;Acc:MGI:2139628]	36.1251	-1.5452	0.00218882
ENSMUSG00000028339	4	Col15a1	protein_coding	collagen, type XV, alpha 1 [Source:MGI Symbol;Acc:MGI:88449]	76.8239	-0.936851	0.0365189
ENSMUSG00000028435	4	Aqp3	protein_coding	aquaporin 3 [Source:MGI Symbol;Acc:MGI:1333777]	332.8	-0.843078	0.0130787
ENSMUSG00000028454	4	Pigo	protein_coding	phosphatidylinositol glycan anchor biosynthesis, class O [Source:MGI Symbol;Acc:MGI:1861452]	419.909	-0.695724	0.00198346
ENSMUSG00000028716	4	Pdzk1ip1	protein_coding	PDZK1 interacting protein 1 [Source:MGI Symbol;Acc:MGI:1914432]	1381.35	-0.573445	0.0400729
ENSMUSG00000028883	5	Sema3a	protein_coding	sema domain, immunoglobulin domain (Ig), short basic domain, secreted, (semaphorin) 3A [Source:MGI Symbol;Acc:MGI:107558]	3052.92	-0.848985	0.00143869
ENSMUSG00000029151	5	Slc30a3	protein_coding	solute carrier family 30 (zinc transporter), member 3 [Source:MGI Symbol;Acc:MGI:1345280]	4358.37	-0.85419	0.00246108
ENSMUSG00000029322	5	Plac8	protein_coding	placenta-specific 8 [Source:MGI Symbol;Acc:MGI:2445289]	34.8446	1.11342	0.0380306
ENSMUSG00000029334	5	Prkg2	protein_coding	protein kinase, cGMP-dependent, type II [Source:MGI Symbol;Acc:MGI:108173]	843.61	-0.594969	0.0378214
ENSMUSG00000029664	6	Tfpi2	protein_coding	tissue factor pathway inhibitor 2 [Source:MGI Symbol;Acc:MGI:108543]	1526.23	-0.928314	0.0009854
ENSMUSG00000029811	6	Aoc1	protein_coding	amine oxidase, copper-containing 1 [Source:MGI Symbol;Acc:MGI:1923757]	180.554	-0.82231	0.01189
ENSMUSG00000030000	6	Add2	protein_coding	adducin 2 [Source:MGI Symbol;Acc:MGI:87919]	184.483	-0.665909	0.0133156
ENSMUSG00000030748	7	Il4ra	protein_coding	interleukin 4 receptor, alpha [Source:MGI Symbol;Acc:MGI:105367]	1275.59	-0.552137	0.0365189
ENSMUSG00000031613	8	Hpgd	protein_coding	hydroxyprostaglandin dehydrogenase 15 (NAD) [Source:MGI Symbol;Acc:MGI:108085]	1459.55	-0.702419	0.0337639
ENSMUSG00000031626	8	Sorbs2	protein_coding	sorbin and SH3 domain containing 2 [Source:MGI Symbol;Acc:MGI:1924574]	207.458	0.644281	0.00443978
ENSMUSG00000031740	8	Mmp2	protein_coding	matrix metallopeptidase 2 [Source:MGI Symbol;Acc:MGI:97009]	13781.7	-0.77241	0.00428788
ENSMUSG00000031796	8	Cfap20	protein_coding	cilia and flagella associated protein 20 [Source:MGI Symbol;Acc:MGI:107428]	1960.22	-0.697631	0.0451835
ENSMUSG00000032014	9	Oaf	protein_coding	out at first homolog [Source:MGI Symbol;Acc:MGI:94852]	1995.15	-0.284108	0.00340627
ENSMUSG00000032092	9	Mpzl2	protein_coding	myelin protein zero-like 2 [Source:MGI Symbol;Acc:MGI:1289160]	655.254	-0.433232	0.0378214
ENSMUSG00000032766	6	Gng11	protein_coding	guanine nucleotide binding protein (G protein), gamma 11 [Source:MGI Symbol;Acc:MGI:1913316]	1031.06	-0.565418	0.00159265
ENSMUSG00000033207	19	Mamdc2	protein_coding	MAM domain containing 2 [Source:MGI Symbol;Acc:MGI:1918988]	198.616	-1.39505	0.00348209
ENSMUSG00000033420	6	Antxr1	protein_coding	anthrax toxin receptor 1 [Source:MGI Symbol;Acc:MGI:1916788]	2146.35	0.313658	0.0220819
ENSMUSG00000034612	10	Chst11	protein_coding	carbohydrate sulfotransferase 11 [Source:MGI Symbol;Acc:MGI:1927166]	1254.81	0.314843	0.0365189
ENSMUSG00000034898	9	Filip1	protein_coding	filamin A interacting protein 1 [Source:MGI Symbol;Acc:MGI:1917848]	1055.79	-0.380363	0.0248327
ENSMUSG00000035561	4	Aldh1b1	protein_coding	aldehyde dehydrogenase 1 family, member B1 [Source:MGI Symbol;Acc:MGI:1919785]	535.342	-0.773677	6.99606e-05
ENSMUSG00000035776	X	Cd99l2	protein_coding	CD99 antigen-like 2 [Source:MGI Symbol;Acc:MGI:2177151]	2145.83	-0.576062	0.0430046
ENSMUSG00000037225	3	Fgf2	protein_coding	fibroblast growth factor 2 [Source:MGI Symbol;Acc:MGI:95516]	150.514	-0.752491	0.0351081
ENSMUSG00000037482	2	Erv3	protein_coding	endogenous retroviral sequence 3 [Source:MGI Symbol;Acc:MGI:1919245]	459.399	0.537769	0.00348209
ENSMUSG00000038668	4	Lpar1	protein_coding	lysophosphatidic acid receptor 1 [Source:MGI Symbol;Acc:MGI:108429]	2574.76	0.311257	0.00649933
ENSMUSG00000039385	15	Cdh6	protein_coding	cadherin 6 [Source:MGI Symbol;Acc:MGI:107435]	198.056	0.541721	0.0430046
ENSMUSG00000039405	7	Prss23	protein_coding	serine protease 23 [Source:MGI Symbol;Acc:MGI:1923703]	2863.14	-0.463993	0.0494712
ENSMUSG00000040649	6	Rimklb	protein_coding	ribosomal modification protein rimK-like family member B [Source:MGI Symbol;Acc:MGI:1918325]	2702.93	0.365836	0.0009854
ENSMUSG00000041324	13	Inhba	protein_coding	inhibin beta-A [Source:MGI Symbol;Acc:MGI:96570]	160.36	-0.599811	0.0378214
ENSMUSG00000041351	4	Rap1gap	protein_coding	Rap1 GTPase-activating protein [Source:MGI Symbol;Acc:MGI:109338]	1693.33	0.293516	0.0378214
ENSMUSG00000041372	6	B4galnt3	protein_coding	beta-1,4-N-acetyl-galactosaminyl transferase 3 [Source:MGI Symbol;Acc:MGI:3041155]	285.027	0.679996	0.00649933
ENSMUSG00000042357	4	Gjb5	protein_coding	gap junction protein, beta 5 [Source:MGI Symbol;Acc:MGI:95723]	178.789	-0.618477	0.0378214
ENSMUSG00000042532	19	Golga7b	protein_coding	golgin A7B [Source:MGI Symbol;Acc:MGI:1918396]	116.338	-1.3099	0.0469058
ENSMUSG00000042659	7	Arrdc4	protein_coding	arrestin domain containing 4 [Source:MGI Symbol;Acc:MGI:1913662]	354.899	-0.940909	0.0339781
ENSMUSG00000045763	15	Basp1	protein_coding	brain abundant, membrane attached signal protein 1 [Source:MGI Symbol;Acc:MGI:1917600]	257.882	0.554224	0.0136868
ENSMUSG00000046971	2	Pla2g4f	protein_coding	phospholipase A2, group IVF [Source:MGI Symbol;Acc:MGI:2685493]	10196.2	-0.63204	0.00240123
ENSMUSG00000047907	2	Tshz2	protein_coding	teashirt zinc finger family member 2 [Source:MGI Symbol;Acc:MGI:2153084]	84278	0.265541	0.0282147
ENSMUSG00000050211	2	Pla2g4e	protein_coding	phospholipase A2, group IVE [Source:MGI Symbol;Acc:MGI:1919144]	18241.3	0.277238	0.0280236
ENSMUSG00000051747	2	Ttn	protein_coding	titin [Source:MGI Symbol;Acc:MGI:98864]	2224.66	0.761374	7.61406e-06
ENSMUSG00000055360	13	Prl2c5	protein_coding	prolactin family 2, subfamily c, member 5 [Source:MGI Symbol;Acc:MGI:1858413]	644.396	-0.645183	0.0357464
ENSMUSG00000056501	2	Cebpb	protein_coding	CCAAT/enhancer binding protein beta [Source:MGI Symbol;Acc:MGI:88373]	155.339	-0.665505	0.0469058
ENSMUSG00000058656	15	Samd12	protein_coding	sterile alpha motif domain containing 12 [Source:MGI Symbol;Acc:MGI:2444518]	4495.67	0.273613	0.0136868
ENSMUSG00000062098	2	Btbd3	protein_coding	BTB domain containing 3 [Source:MGI Symbol;Acc:MGI:2385155]	44.133	-1.14923	0.0429644
ENSMUSG00000062563	12	Cys1	protein_coding	cystin 1 [Source:MGI Symbol;Acc:MGI:2177632]	434.741	-0.589795	0.00489179
ENSMUSG00000063305	7	Psg20	protein_coding	pregnancy-specific beta-1-glycoprotein 20 [Source:MGI Symbol;Acc:MGI:1891352]	112.44	-0.86217	0.00145384
ENSMUSG00000063415	6	Cyp26b1	protein_coding	cytochrome P450, family 26, subfamily b, polypeptide 1 [Source:MGI Symbol;Acc:MGI:2176159]	475.888	0.456271	0.037556
ENSMUSG00000064080	6	Fbln2	protein_coding	fibulin 2 [Source:MGI Symbol;Acc:MGI:95488]	118.972	-0.856016	0.0378214
ENSMUSG00000067219	5	Nipal1	protein_coding	NIPA-like domain containing 1 [Source:MGI Symbol;Acc:MGI:1917951]	487.636	-0.494596	0.0220819
ENSMUSG00000069258	13	Prl2b1	protein_coding	prolactin family 2, subfamily b, member 1 [Source:MGI Symbol;Acc:MGI:1861444]	1375.16	-0.674743	0.0339781
ENSMUSG00000070719	2	Pla2g4d	protein_coding	phospholipase A2, group IVD [Source:MGI Symbol;Acc:MGI:1925640]	1376.17	-0.728424	0.00246108
ENSMUSG00000071713	15	Csf2rb	protein_coding	colony stimulating factor 2 receptor, beta, low-affinity (granulocyte-macrophage) [Source:MGI Symbol;Acc:MGI:1339759]	1103.43	-0.785134	0.0280236
ENSMUSG00000078532	4	Nkain1	protein_coding	Na+/K+ transporting ATPase interacting 1 [Source:MGI Symbol;Acc:MGI:1914399]	1410.98	-0.367794	0.0380306
ENSMUSG00000079685	10	Ulbp1	protein_coding	UL16 binding protein 1 [Source:MGI Symbol;Acc:MGI:1925027]	365.624	0.570444	0.0378214
ENSMUSG00000087651	10	1500009L16Rik	protein_coding	RIKEN cDNA 1500009L16 gene [Source:MGI Symbol;Acc:MGI:1917034]	211.746	-0.651332	0.042453
ENSMUSG00000092341	19	Malat1	lncRNA	metastasis associated lung adenocarcinoma transcript 1 (non-coding RNA) [Source:MGI Symbol;Acc:MGI:1919539]	22799.8	-0.443761	0.00677911
ENSMUSG00000107881	6	Gm44250	TEC	predicted gene, 44250 [Source:MGI Symbol;Acc:MGI:5690642]	205.043	-1.2933	0.000224237
ENSMUSG00000108084	6	Gm7932	lncRNA	predicted gene 7932 [Source:MGI Symbol;Acc:MGI:3643446]	2550.32	-0.496927	0.00649933
ENSMUSG00000113535	12	AU015791	lncRNA	expressed sequence AU015791 [Source:MGI Symbol;Acc:MGI:2144938]	4198.13	-0.548132	0.0151493
ENSMUSG00000114502	13	Gm40975	lncRNA	predicted gene, 40975 [Source:MGI Symbol;Acc:MGI:5623860]	1021.98	-0.353562	0.0494712

## Sheet: FEMALE MD-WD vs CD
GeneID	Chromosome/scaffold name	Gene name	Gene type	Gene description	baseMean	log2FoldChange	padj
ENSMUSG00000003420	7	Fcgrt	protein_coding	Fc fragment of IgG receptor and transporter [Source:MGI Symbol;Acc:MGI:103017]	195.41	-1.13233	0.034251
ENSMUSG00000005124	15	Ccn4	protein_coding	cellular communication network factor 4 [Source:MGI Symbol;Acc:MGI:1197008]	176.564	-1.03858	0.0191457
ENSMUSG00000020407	11	Upp1	protein_coding	uridine phosphorylase 1 [Source:MGI Symbol;Acc:MGI:1097668]	21934	-0.600193	0.0284016
ENSMUSG00000020766	11	Galk1	protein_coding	galactokinase 1 [Source:MGI Symbol;Acc:MGI:95730]	312.45	0.917727	0.00429617
ENSMUSG00000022037	14	Clu	protein_coding	clusterin [Source:MGI Symbol;Acc:MGI:88423]	45.1353	1.22037	0.0446877
ENSMUSG00000022048	14	Dpysl2	protein_coding	dihydropyrimidinase-like 2 [Source:MGI Symbol;Acc:MGI:1349763]	637.087	0.397196	0.0284016
ENSMUSG00000023987	17	Pgc	protein_coding	progastricsin (pepsinogen C) [Source:MGI Symbol;Acc:MGI:98909]	643.556	-0.615033	0.0319921
ENSMUSG00000026586	1	Prrx1	protein_coding	paired related homeobox 1 [Source:MGI Symbol;Acc:MGI:97712]	106.265	-1.12084	0.0343706
ENSMUSG00000026674	1	Ddr2	protein_coding	discoidin domain receptor family, member 2 [Source:MGI Symbol;Acc:MGI:1345277]	702.279	0.397104	0.047435
ENSMUSG00000027377	2	Mall	protein_coding	mal, T cell differentiation protein-like [Source:MGI Symbol;Acc:MGI:2385152]	1700.51	0.32873	0.0358284
ENSMUSG00000027643	2	Ghrh	protein_coding	growth hormone releasing hormone [Source:MGI Symbol;Acc:MGI:95709]	1024.45	-0.663863	0.0254515
ENSMUSG00000028195	3	Ccn1	protein_coding	cellular communication network factor 1 [Source:MGI Symbol;Acc:MGI:88613]	611.284	-0.886615	0.0343706
ENSMUSG00000028307	4	Aldob	protein_coding	aldolase B, fructose-bisphosphate [Source:MGI Symbol;Acc:MGI:87995]	749.423	0.662377	0.0340461
ENSMUSG00000028339	4	Col15a1	protein_coding	collagen, type XV, alpha 1 [Source:MGI Symbol;Acc:MGI:88449]	483.917	-0.903897	0.0412092
ENSMUSG00000028381	4	Ugcg	protein_coding	UDP-glucose ceramide glucosyltransferase [Source:MGI Symbol;Acc:MGI:1332243]	659.157	-0.67521	0.0191457
ENSMUSG00000028883	5	Sema3a	protein_coding	sema domain, immunoglobulin domain (Ig), short basic domain, secreted, (semaphorin) 3A [Source:MGI Symbol;Acc:MGI:107558]	435.584	-1.03015	0.0284016
ENSMUSG00000029154	5	Cwh43	protein_coding	cell wall biogenesis 43 C-terminal homolog [Source:MGI Symbol;Acc:MGI:2444131]	4698.45	0.585254	0.0149149
ENSMUSG00000029313	5	Aff1	protein_coding	AF4/FMR2 family, member 1 [Source:MGI Symbol;Acc:MGI:1100819]	3840.19	-0.493597	0.0469668
ENSMUSG00000029322	5	Plac8	protein_coding	placenta-specific 8 [Source:MGI Symbol;Acc:MGI:2445289]	22.3709	-2.36968	0.0412092
ENSMUSG00000032758	6	Kap	protein_coding	kidney androgen regulated protein [Source:MGI Symbol;Acc:MGI:96653]	612.696	1.15213	0.0149149
ENSMUSG00000035107	16	Dcbld2	protein_coding	discoidin, CUB and LCCL domain containing 2 [Source:MGI Symbol;Acc:MGI:1920629]	2362.82	-0.72157	0.0412092
ENSMUSG00000036570	7	Fxyd1	protein_coding	FXYD domain-containing ion transport regulator 1 [Source:MGI Symbol;Acc:MGI:1889273]	74.6207	-1.08369	0.0340461
ENSMUSG00000037482	2	Erv3	protein_coding	endogenous retroviral sequence 3 [Source:MGI Symbol;Acc:MGI:1919245]	33.208	-1.25744	0.0358284
ENSMUSG00000038539	7	Atf5	protein_coding	activating transcription factor 5 [Source:MGI Symbol;Acc:MGI:2141857]	828.022	-0.556242	0.0319921
ENSMUSG00000038580	7	Sct	protein_coding	secretin [Source:MGI Symbol;Acc:MGI:99466]	5494	0.673926	0.0191457
ENSMUSG00000039529	18	Atp8b1	protein_coding	ATPase, class I, type 8B, member 1 [Source:MGI Symbol;Acc:MGI:1859665]	20.8594	-3.52817	0.0149149
ENSMUSG00000040152	2	Thbs1	protein_coding	thrombospondin 1 [Source:MGI Symbol;Acc:MGI:98737]	1648.7	-0.504832	0.0191457
ENSMUSG00000040473	5	Cfap69	protein_coding	cilia and flagella associated protein 69 [Source:MGI Symbol;Acc:MGI:2443778]	29.1029	-1.6391	0.0355298
ENSMUSG00000042357	4	Gjb5	protein_coding	gap junction protein, beta 5 [Source:MGI Symbol;Acc:MGI:95723]	9753.42	-0.569793	0.0284016
ENSMUSG00000043903	8	Zfp469	protein_coding	zinc finger protein 469 [Source:MGI Symbol;Acc:MGI:2684868]	1021.76	-0.410119	0.0319921
ENSMUSG00000045004	4	Spata21	protein_coding	spermatogenesis associated 21 [Source:MGI Symbol;Acc:MGI:3607787]	12908.1	0.325436	0.00953192
ENSMUSG00000045312	13	Lhfpl2	protein_coding	lipoma HMGIC fusion partner-like 2 [Source:MGI Symbol;Acc:MGI:2145236]	1597.13	-0.950968	0.0343649
ENSMUSG00000045731	14	Pnoc	protein_coding	prepronociceptin [Source:MGI Symbol;Acc:MGI:105308]	943.135	-0.456117	0.034251
ENSMUSG00000045763	15	Basp1	protein_coding	brain abundant, membrane attached signal protein 1 [Source:MGI Symbol;Acc:MGI:1917600]	46.2315	-1.28635	0.0355298
ENSMUSG00000052125	12	F730043M19Rik	lncRNA	RIKEN cDNA F730043M19 gene [Source:MGI Symbol;Acc:MGI:2443237]	915.039	0.786909	0.0293929
ENSMUSG00000061082	X	Plac1	protein_coding	placental specific protein 1 [Source:MGI Symbol;Acc:MGI:1926287]	164.962	-0.922096	0.0469668
ENSMUSG00000063077	4	Kif1b	protein_coding	kinesin family member 1B [Source:MGI Symbol;Acc:MGI:108426]	140.17	1.1599	0.00429617
ENSMUSG00000063171	6	Rps4l	protein_coding	ribosomal protein S4-like [Source:MGI Symbol;Acc:MGI:1913434]	924.371	-0.680467	0.0316679
ENSMUSG00000063415	6	Cyp26b1	protein_coding	cytochrome P450, family 26, subfamily b, polypeptide 1 [Source:MGI Symbol;Acc:MGI:2176159]	47.0516	-1.47036	0.0149149
ENSMUSG00000064373	15	Selenop	protein_coding	selenoprotein P [Source:MGI Symbol;Acc:MGI:894288]	4603.1	0.348804	0.0343649
ENSMUSG00000068923	3	Syt11	protein_coding	synaptotagmin XI [Source:MGI Symbol;Acc:MGI:1859547]	797.524	0.57397	0.0358284
ENSMUSG00000069072	3	Slc7a14	protein_coding	solute carrier family 7 (cationic amino acid transporter, y+ system), member 14 [Source:MGI Symbol;Acc:MGI:3040688]	1567.47	-0.318198	0.0284016
ENSMUSG00000070719	2	Pla2g4d	protein_coding	phospholipase A2, group IVD [Source:MGI Symbol;Acc:MGI:1925640]	800.251	-0.830167	0.00607377
ENSMUSG00000071766	X	Rhox12	protein_coding	reproductive homeobox 12 [Source:MGI Symbol;Acc:MGI:2685994]	4556.89	-0.593993	0.019771
ENSMUSG00000073538	1	E330020D12Rik	lncRNA	Riken cDNA E330020D12 gene [Source:MGI Symbol;Acc:MGI:3761270]	440.027	-0.722614	0.0358284
ENSMUSG00000079554	1	Aox2	protein_coding	aldehyde oxidase 2 [Source:MGI Symbol;Acc:MGI:3529596]	88.0074	-0.970595	0.0293929
ENSMUSG00000087651	10	1500009L16Rik	protein_coding	RIKEN cDNA 1500009L16 gene [Source:MGI Symbol;Acc:MGI:1917034]	661.779	0.771885	0.0412092
ENSMUSG00000092341	19	Malat1	lncRNA	metastasis associated lung adenocarcinoma transcript 1 (non-coding RNA) [Source:MGI Symbol;Acc:MGI:1919539]	1614.2	0.327901	0.0319921
ENSMUSG00000099764	16	Rps10-ps2	processed_pseudogene	ribosomal protein S10, pseudogene 2 [Source:MGI Symbol;Acc:MGI:3645627]	48.4903	-1.0746	0.0406921
ENSMUSG00000113535	12	AU015791	lncRNA	expressed sequence AU015791 [Source:MGI Symbol;Acc:MGI:2144938]	216.02	0.77609	0.0254515
ENSMUSG00000113856	13	Gm10790	lncRNA	predicted gene 10790 [Source:MGI Symbol;Acc:MGI:3641845]	2015.83	0.348646	0.0343649
ENSMUSG00000114667	13	Ctsm-ps	unprocessed_pseudogene	cathepsin M, pseudogene [Source:MGI Symbol;Acc:MGI:2656172]	143.875	-1.54209	0.034251
